# Supplementary material
Source: publisher figshare collection journal article supplement (https://acs.figshare.com/ndownloader/files/27056675)
Supplement: Supplementary file 1 [file 27056675]

# **Multi-Scale Modeling of a Direct Non-Oxidative Methane Dehydroaromatization Reactor with a Validated Model for Catalyst Deactivation**

Chirag Mevawala, Xinwei Bai, Goutham Kotamreddy, Debangsu Bhattacharyya\*, Jianli Hu  
Department of Chemical and Biomedical Engineering, West Virginia University, Morgantown,  
WV 26506, USA

## **Key Words**

Non-oxidative methane dehydroaromatization (DHA), Fixed bed reactor, Data reconciliation, Dynamic parameter estimation, Catalyst deactivation

---

\* Corresponding author.

Tel: [1-304-293-9335](tel:1-304-293-9335), E-mail: [Debangsu.Bhattacharyya@mail.wvu.edu](mailto:Debangsu.Bhattacharyya@mail.wvu.edu)

## APPENDIX A

Temperature profile for conducting the TGA experiment is shown in Figure A.1.

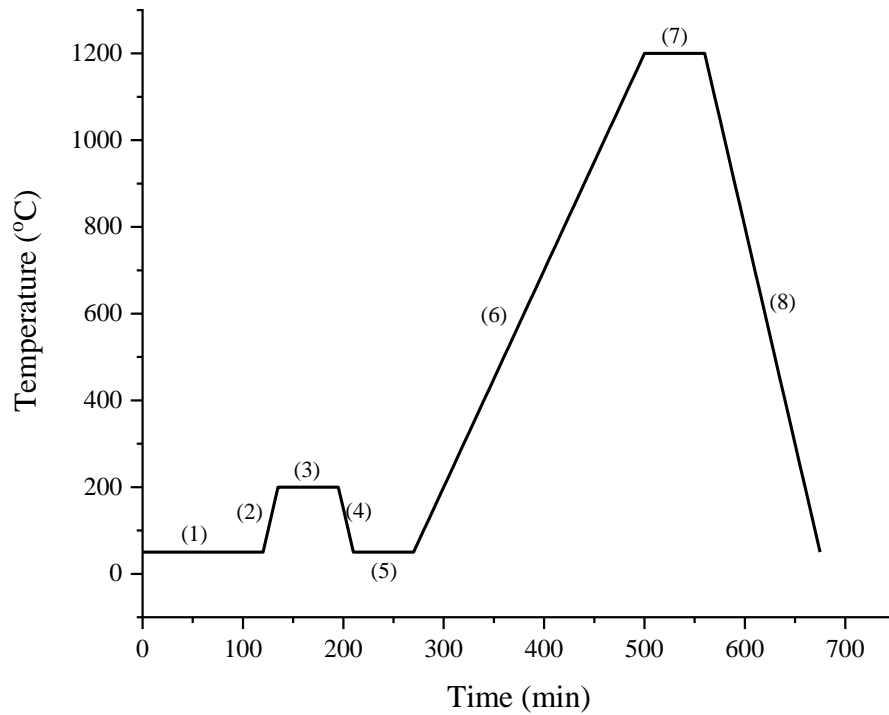

**Figure A.1. Temperature profile of thermogravimetric analysis (TGA) experiments**

The detail numerical reading for Figure 2 is shown in Table A.1.

**Table A.1. Detailed numerical reading of Figure 2**

| Samples | Initial Weight | Weight at the End<br>of Step 6 | Weight at the End of<br>Step 7<br>(mg) | Total Weight Loss |
|---------|----------------|--------------------------------|----------------------------------------|-------------------|
| a       | 35.937         | 32.432                         | 32.200                                 | 3.737             |
| b       | 33.463         | 29.480                         | 29.330                                 | 4.133             |
| c       | 43.350         | 37.694                         | 37.526                                 | 5.656             |
| d       | 34.895         | 29.985                         | 29.856                                 | 5.039             |

## APPENDIX B

Data reconciliation for 725 °C and 750 °C temperature is shown in Figure B.1.

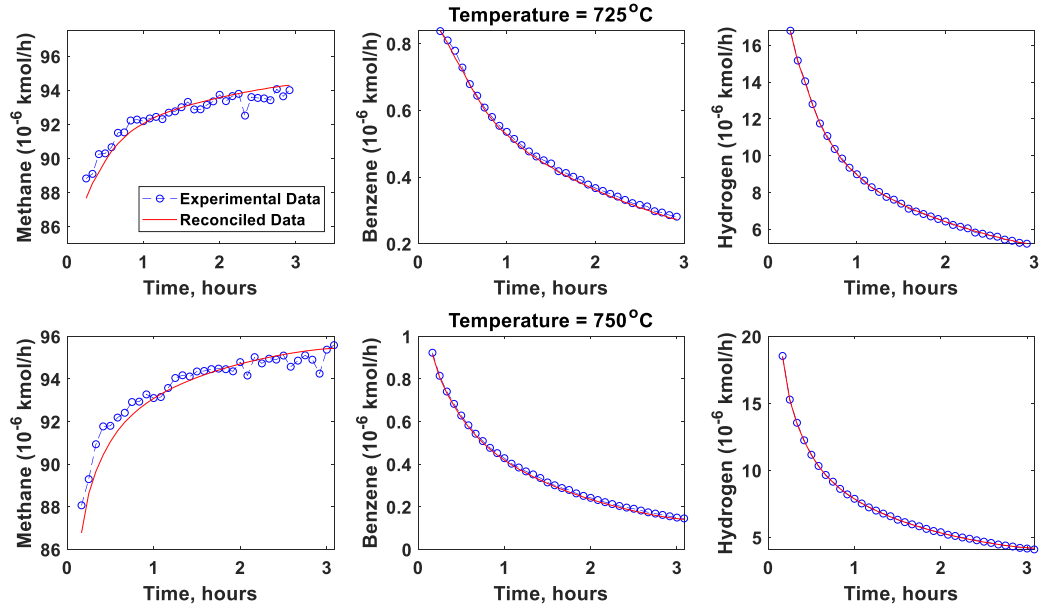

**Figure B.1. Data reconciliation plots for 725 °C and 750 °C temperature**

## APPENDIX C

The comparison of parameter estimation model result with experimental data for 800 °C is shown in Figure C.1.

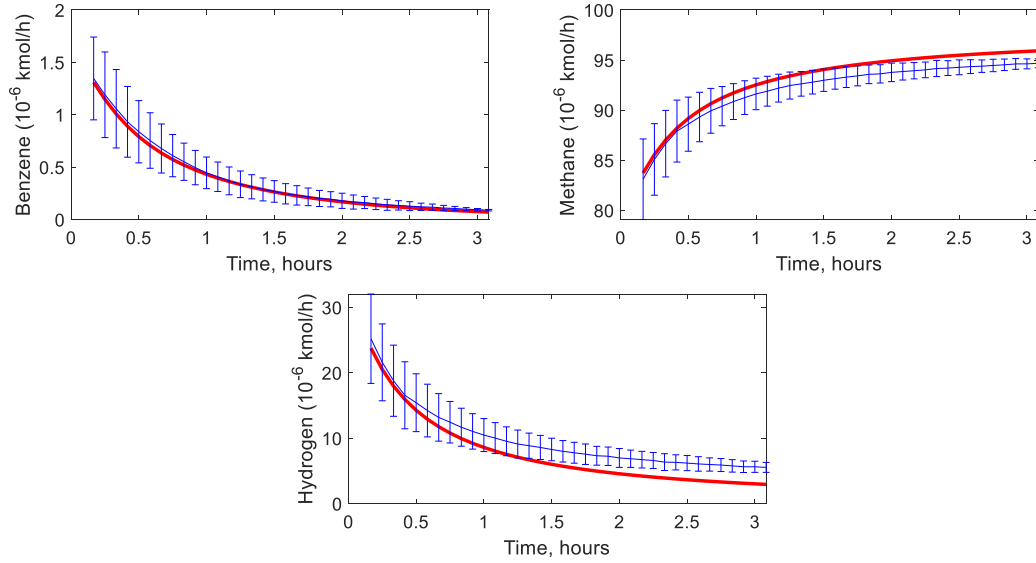

**Figure C.1. Comparison of parameter estimation model with experimental data for 800 °C**

## APPENDIX D

Sample Gantt chart for 2 parallel reactor cyclic operation is shown in Figure D.1. The blue color indicates reactor undergoing methane DHA reaction, black color indicates catalyst regeneration, and green color indicates cooling/preparation time. It should be noted that this is not an optimized Gantt chart. Figure D.1 shows the Gantt chart for 2 parallel reactor cyclic operation. Here, the total number of reactors required is 4 for continuous operation, and at any given time 2 reactors are undergoing methane DHA reaction.

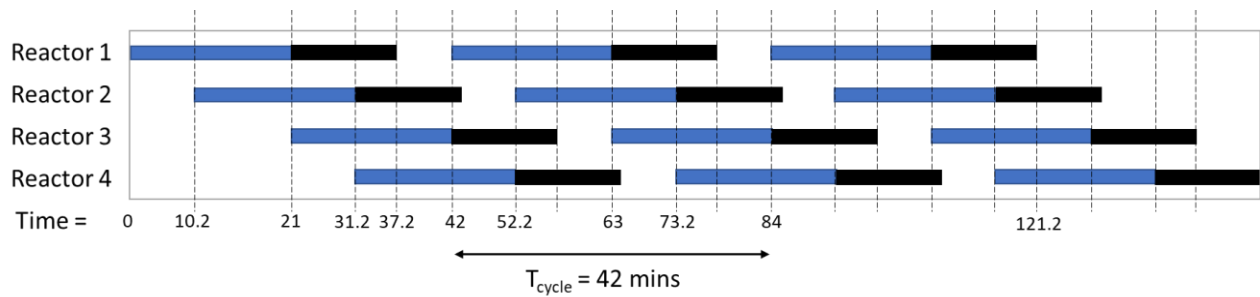

**Figure D.1. Gantt chat for 2 parallel reactor cyclic operation**
